# Supplementary material for: ECS1 and ECS2 suppress polyspermy and the formation of haploid plants by promoting double fertilization
Source: eLife. 2023 Jul 25;12:e85832. doi: 10.7554/eLife.85832 (PMC10421590; doi:10.7554/eLife.85832)
Supplement: Figure 1—source data 2. [file elife-85832-fig1-data2.xlsx]

## Sheet: Polyspermy frequency
The occurence of polyspermy in different genotypes and accessions
Experiments	WT		ecs1 ecs2-1
	Triparental triploid plants	Total seeds analyzed	Triparental triploid plants	Total seeds analyzed
1	8	40942	18	32187
2	9	15678	15	10736
3	7	39970	20	34518
Experiments	WT		ecs1 ecs2-2
	Triparental triploid plants	Total seeds analyzed	Triparental triploid plants	Total seeds analyzed
1	0	14351	7	12148
2	3	12418	7	7909
3	11	40118	9	35394
Experiments	ecs1 ecs2-1		ecs1 ecs2-1 gECS1
	Triparental triploid plants	Total seeds analyzed	Triparental triploid plants	Total seeds analyzed
1	11	33240	9	38987
2	20	12521	0	15126
4	6	12474	6	14856
5	10	12812	5	15378
Experiments	WT, Ler		WT, Col-0
	Triparental triploid plants	Total seeds analyzed	Triparental triploid plants	Total seeds analyzed
1	3	19077	3	16369
2	0	33953	4	30031
3	0	18763	0	15009
4	3	13938	6	11214
5	3	21645	6	20057
