# Supplementary material for: ECS1 and ECS2 suppress polyspermy and the formation of haploid plants by promoting double fertilization
Source: eLife. 2023 Jul 25;12:e85832. doi: 10.7554/eLife.85832 (PMC10421590; doi:10.7554/eLife.85832)
Supplement: Figure 2—figure supplement 1—source data 1. [file elife-85832-fig2-figsupp1-data1.xlsx]

## Sheet: Sheet1
			Genotype	1st silique					2nd silique					3rd silique
				Sterility	Early Abortion	Late Abortion	Normal	Total seeds	Sterility	Early Abortion	Late Abortion	Normal	Total seeds	Sterility	Early Abortion	Late Abortion	Normal	Total seeds
			WT	0	0	0	29	29	0	0	0	29	29	0	0	0	32	32
			WT	0	0	0	30	30	0	0	0	28	28	0	0	0	32	32
			WT	0	0	0	33	33	0	0	0	31	31	0	0	0	36	36
			WT	0	0	0	34	34	0	0	0	30	30	0	0	0	29	29
			WT	0	0	0	36	36	0	0	0	33	33	0	0	0	32	32
			ecs1 ecs2-1	0	0	5	25	30	0	0	7	25	32	0	0	7	19	26
			ecs1 ecs2-1	0	0	2	24	26	1	0	3	24	28	0	0	2	27	29
			ecs1 ecs2-1	0	0	5	26	31	1	1	5	25	32	0	1	2	28	31
			ecs1 ecs2-1	0	0	5	25	30	0	0	1	35	36	0	3	5	22	30
			ecs1 ecs2-1	0	1	5	22	28	0	3	5	28	36	1	0	4	25	30
			ecs1 ecs2-2	0	1	4	24	29	0	0	5	26	31	0	1	4	28	33
			ecs1 ecs2-2	0	2	4	28	34	0	1	9	22	32	0	3	8	21	32
			ecs1 ecs2-2	0	3	3	27	33	0	2	6	23	31	0	3	4	24	31
			ecs1 ecs2-2	0	1	4	19	24	0	2	3	23	28	1	1	4	22	28
			﻿ecs1 ecs2-1 gECS1	0	0	0	32	32	1	0	0	27	28	0	0	0	31	31
			﻿ecs1 ecs2-1 gECS1	0	0	0	31	31	0	0	0	31	31	1	1	0	33	35
			﻿ecs1 ecs2-1 gECS1	0	0	0	32	32	0	0	0	27	27	0	0	0	29	29
			﻿ecs1 ecs2-1 gECS1	0	0	0	29	29	0	0	0	31	31	0	0	0	32	32
			﻿ecs1 ecs2-1 gECS1	0	0	0	30	30	0	0	0	35	35	0	0	0	33	33
			﻿ecs1 ecs2-1 gECS2	1	0	0	28	29	0	0	0	27	27	0	0	0	27	27
			﻿ecs1 ecs2-1 gECS2	0	0	0	30	30	1	0	1	29	31	1	0	0	32	33
			﻿ecs1 ecs2-1 gECS2	0	0	1	30	31	0	0	0	28	28	1	0	0	31	32
			﻿ecs1 ecs2-1 gECS2	0	0	0	34	34	0	0	0	31	31	0	0	0	36	36
			﻿ecs1 ecs2-1 gECS2	0	0	0	30	30	0	0	0	28	28	0	0	0	29	29
