# Supplementary material for: ECS1 and ECS2 suppress polyspermy and the formation of haploid plants by promoting double fertilization
Source: eLife. 2023 Jul 25;12:e85832. doi: 10.7554/eLife.85832 (PMC10421590; doi:10.7554/eLife.85832)
Supplement: Supplementary file 1. [file elife-85832-supp1.xlsx]

## Sheet: Sheet2
Primer sequences used for genotyping and plasmid construction
Oligos	Sequence (5'-3')	Application
YM66s	TTCACAACCAAAACCGATCTC	Genotyping of SALK_021086 (ecs1)
YM66as	AAAACGCTAGCTCTTAACGGC
YM67s	TCGAAGGTACCACCGTTATTG	Genotyping of SALK_090795 (ecs2-1)
YM67as	CGGCCAAAAGTACTCTCAGTG
YM68s	CAGTCGTTCAGCAAAGGAGAC	Genotyping of SALK_036333 (ecs2-2)
YM68as	ATTGGTAGATTGGTGACACGC
YM76s (AscI)	GGCGCGCCGAGATTTGGGAAATGTGCAAT	Amplification of genomic region of ECS1
YM76as (NotI)	GCGGCCGCTAAGTTCCCGGAGCAATCCAT
YM78s (AscI)	GGCGCGCCCCATCCTCATGACAGTACCTGGA	Amplification of genomic region of ECS2
YM78as (NotI)	GCGGCCGCCAAATTCGCAGAGCAATCCAT
YM86as (PacI)	TTAATTAAGGCTAAGAGAGAACAGTAGAG	Amplification of promoter region of ECS1 together with YM76s
YM87as (PacI)	TTAATTAAGAGAGAGTCACCGAGAAGAAG	Amplification of promoter region of ECS2 together with YM78s
TN12s	ATTTAATTAAATGAAGCTCCTGTCCTCCATCGA	GAL4 detection
TN12as	ATGCGGCCGCCTACCCACCGTACTCGTCAATTC
TN26s	GCAGGAGTGGACGGACGACCTCGTCCGTCTG	UAS detection
TN26as	TCACGAACTCCAGCAGGACCATGTGATCGCG
Ch1-F	TAAGATTGCTCAGAAGCTGAGTGAG	RFLPs detection in Chromosome 1 together with restriction enzyme SacⅠ
Ch1-R	CGACACACAATGTATCTGTTTACCC
Ch2-F	TGGTTCACATGTACGCCAAGTGTTACC	RFLPs detection in Chromosome 2 together with restriction enzyme BamHⅠ
Ch2-R	CTTCCCTTCATTAACCATCCCTGTGTG
Ch3-F	TGTCTTCAGCATATATGCCGATTGGAG	RFLPs detection in Chromosome 3 together with restriction enzyme HindⅢ
Ch3-R	CAATCTCTTCAGGTGAGATAATGAGCG
Ch4-F	TCTCTTGCTCTCTTCTCTCTCACACAG	RFLPs detection in Chromosome 4 together with restriction enzyme EcoRⅤ
Ch4-R	ACCTCTTGTGGAGTATCAAGCCAAGTG
Ch5-F	AACAGTAATGGTCCCCATTCACGGTGG	RFLPs detection in Chromosome 5 together with restriction enzyme HindⅢ
Ch5-R	CCAATTAGACCTTGAAGGAGCAGGACC
