# Supplementary figures and images for: ECS1 and ECS2 suppress polyspermy and the formation of haploid plants by promoting double fertilization
Source: eLife journal article supplement (doi:10.7554/elife.85832), 2023-07-25

Figure 3 - figure supplement 2

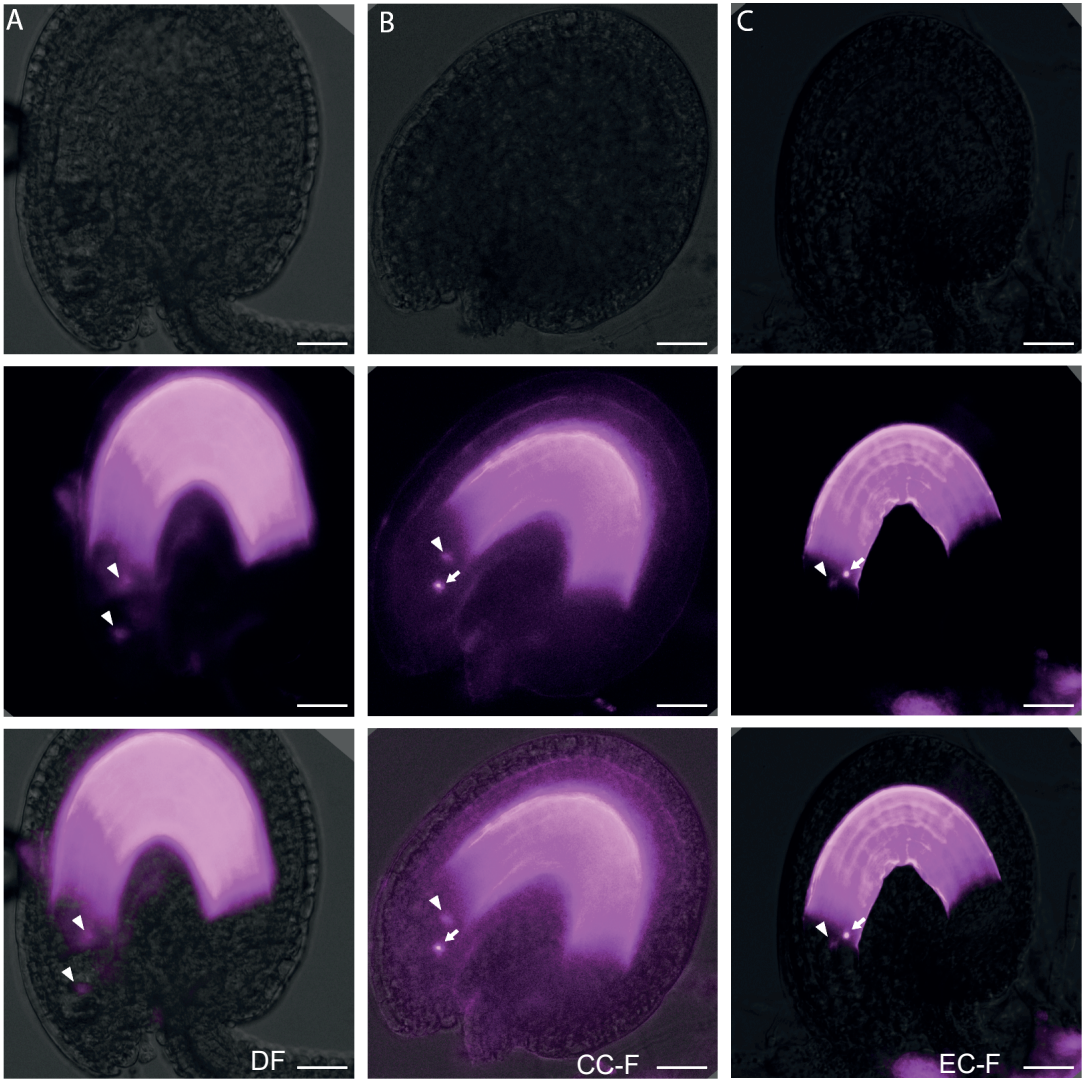

Supplement: supp [file elife-85832-supp-v1.zip]

Figure 2 - Figure supplement 1

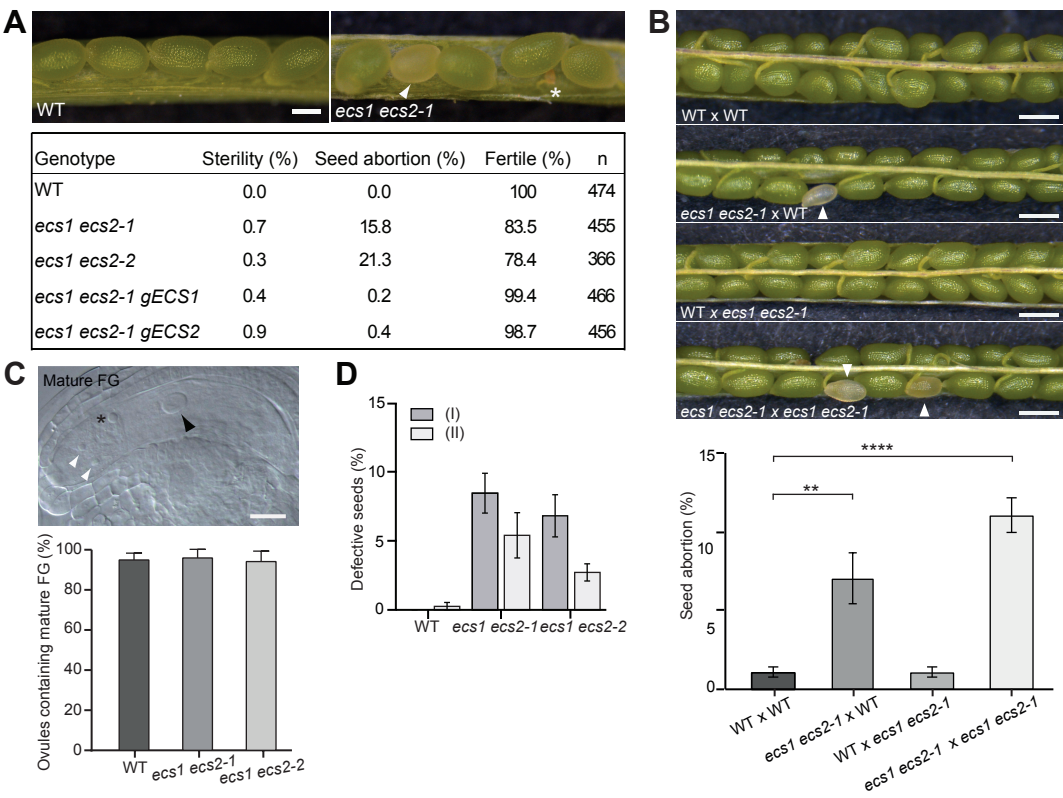

Supplement: supp [file elife-85832-supp-v1.zip]

Figure 3 - Figure supplement 1

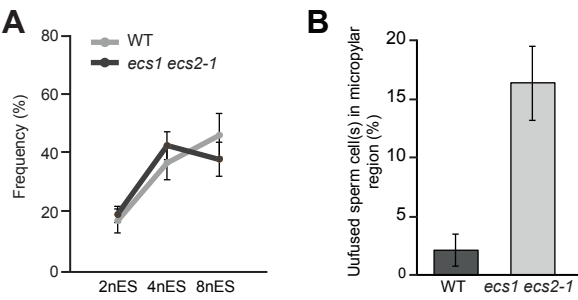

Supplement: supp [file elife-85832-supp-v1.zip]

Figure 1- Figure supplement 1

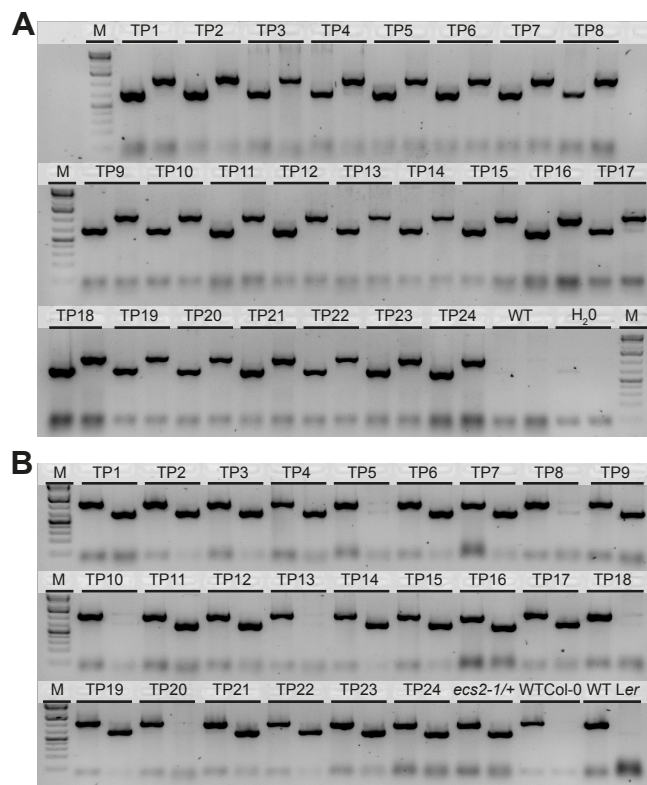

Supplement: supp [file elife-85832-supp-v1.zip]

Figure 4 - Figure supplement 2

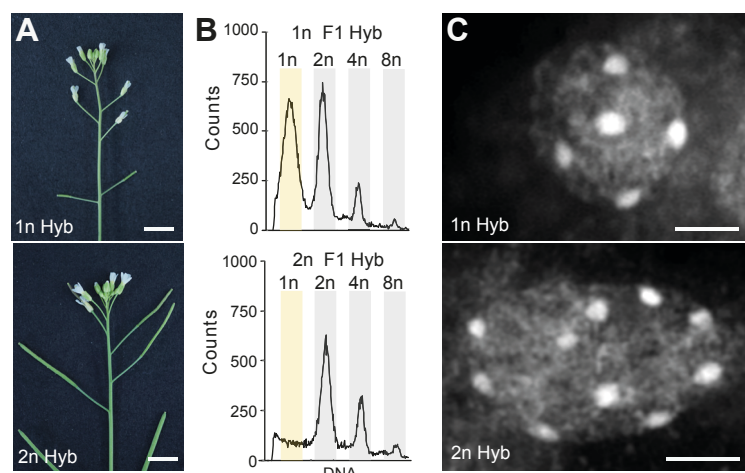

Supplement: supp [file elife-85832-supp-v1.zip]

Figure 4 - Figure supplement 3

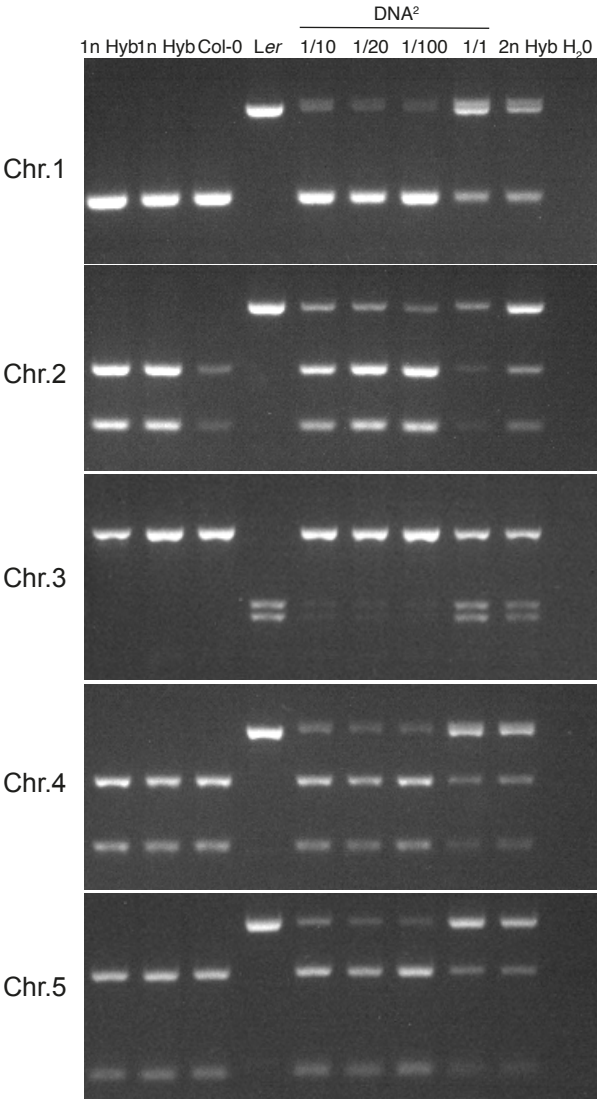

Supplement: supp [file elife-85832-supp-v1.zip]

Figure 4 - Figure supplement 1

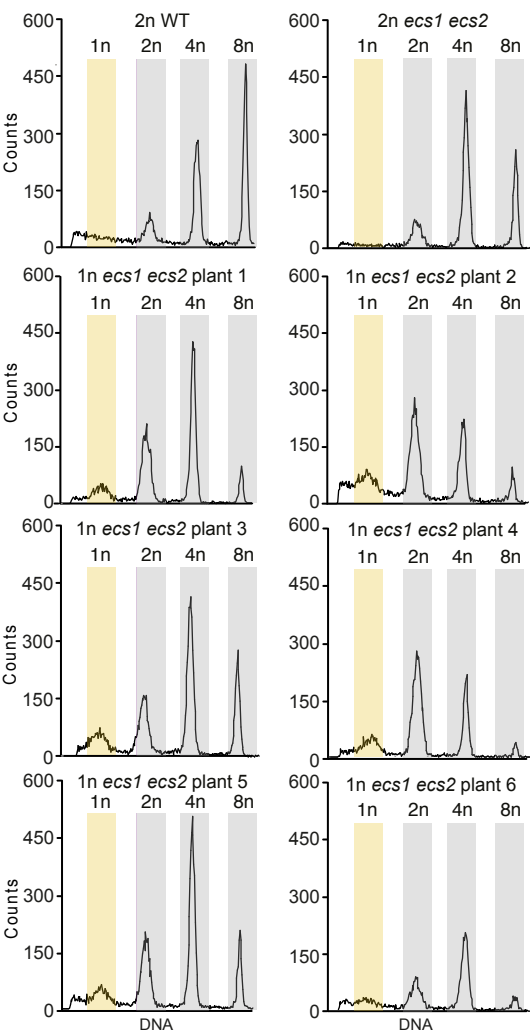

Supplement: supp [file elife-85832-supp-v1.zip]
